# Supplementary material
Source: PubMed Central journal article supplement (PMC3727235)
Supplement: NIHMS493832-supplement-Supplementary_Data.pdf [file NIHMS493832-supplement-Supplementary_Data.pdf]

## SUPPLEMENTARY TABLES AND FIGURES

### Exome array analysis identifies novel loci and low-frequency variants for insulin

#### processing and secretion

Jeroen R Huyghe<sup>1</sup>, Anne U Jackson<sup>1</sup>, Marie P Fogarty<sup>2</sup>, Martin L Buchkovich<sup>2</sup>, Alena Stančáková<sup>3</sup>, Heather M Stringham<sup>1</sup>, Xueling Sim<sup>1</sup>, Lingyao Yang<sup>1</sup>, Christian Fuchsberger<sup>1</sup>, Henna Cederberg<sup>3</sup>, Peter S Chines<sup>4</sup>, Tanya M Teslovich<sup>1</sup>, Jane M Romm<sup>5</sup>, Hua Ling<sup>5</sup>, Ivy McMullen<sup>5</sup>, Roxann Ingersoll<sup>5</sup>, Elizabeth W Pugh<sup>5</sup>, Kimberly F Doheny<sup>5</sup>, Benjamin M Neale<sup>6-8</sup>, Mark J Daly<sup>9</sup>, Johanna Kuusisto<sup>3</sup>, Laura J Scott<sup>1</sup>, Hyun Min Kang<sup>1</sup>, Francis S Collins<sup>4</sup>, Gonçalo R Abecasis<sup>1</sup>, Richard M Watanabe<sup>10,11</sup>, Michael Boehnke<sup>1,12</sup>, Markku Laakso<sup>3,12</sup>, Karen L Mohlke<sup>2,12</sup>

1. Department of Biostatistics and Center for Statistical Genetics, University of Michigan, Ann Arbor, Michigan, USA.
2. Department of Genetics, University of North Carolina, Chapel Hill, North Carolina, USA.
3. Department of Medicine, University of Eastern Finland and Kuopio University Hospital, Kuopio, Finland.
4. Genome Technology Branch, National Human Genome Research Institute, Bethesda, Maryland, USA.
5. The Center for Inherited Disease Research, Johns Hopkins University, Baltimore, Maryland, USA.
6. The Broad Institute of MIT and Harvard, Cambridge, Massachusetts, USA.
7. The Center for Human Genetic Research, Massachusetts General Hospital, Boston, Massachusetts, USA.
8. Analytic and Translational Genetics Unit, Massachusetts General Hospital, Boston, Massachusetts, USA.
9. Department of Genetics, Harvard University, Cambridge, Massachusetts, USA.
10. Department of Preventive Medicine, Keck School of Medicine of USC, Los Angeles, California, USA.
11. Department of Physiology and Biophysics, Keck School of Medicine of USC, Los Angeles, California, USA.
12. These authors jointly directed this work.

## Contents

- Supplementary Table 1 (page 3)
- Supplementary Table 2 (page 4)
- Supplementary Table 3 (page 5)
- Supplementary Table 4 (page 6)
- Supplementary Table 5 (page 7-8)
- Supplementary Table 6 (page 9)
- Supplementary Table 7 (page 9)
- Supplementary Figure Legends (page 10-12)
- Supplementary Figure 1 (page 13-15)
- Supplementary Figure 2 (page 16-17)
- Supplementary Figure 3 (page 18)
- Supplementary Figure 4 (page 19)
- Supplementary Figure 5 (page 20)
- Supplementary Figure 6 (page 21)
- Supplementary Figure 7 (page 22)
- Supplementary Figure 8 (page 23)
- Supplementary References (page 24)

**Supplementary Table 1. Characteristics of non-diabetic METSIM study participants analyzed**

| Variable                                                  | <i>n</i> | Mean    | SD      | Minimum  | Maximum  |
|-----------------------------------------------------------|----------|---------|---------|----------|----------|
| Age (years)                                               | 8,229    | 57.1    | 7.1     | 45.0     | 74.0     |
| BMI (kg/m <sup>2</sup> )                                  | 8,229    | 26.8    | 3.8     | 16.2     | 51.6     |
| Fasting glucose (mM)                                      | 8,229    | 5.71    | 0.48    | 3.50     | 6.90     |
| Glucose at 120 min of an OGTT (mM)                        | 8,219    | 6.06    | 1.69    | 1.40     | 11.00    |
| Fasting proinsulin (pM)                                   | 8,227    | 13.8    | 6.7     | 2.3      | 90.5     |
| Fasting insulin (pM)                                      | 8,225    | 49.7    | 35.5    | 6.0      | 611.4    |
| Fasting proinsulin/insulin ratio                          | 8,224    | 0.334   | 0.155   | 0.030    | 2.242    |
| Early-phase <sup>a</sup> proinsulin AUC (pM × min)        | 8,191    | 669.0   | 313.8   | 135.0    | 3,730.5  |
| Late-phase <sup>b</sup> proinsulin AUC (pM × min)         | 8,186    | 3,688.8 | 1,765.5 | 612.0    | 21,064.5 |
| Early-phase <sup>a</sup> proinsulin AUC/insulin AUC ratio | 8,175    | 0.118   | 0.053   | 0.015    | 0.686    |
| Late-phase <sup>b</sup> proinsulin AUC/insulin AUC ratio  | 8,165    | 0.139   | 0.062   | 0.025    | 0.618    |
| Insulinogenic index (pmol/mmol) <sup>c</sup>              | 8,161    | 131.7   | 218.3   | -4,665.0 | 7,626.0  |
| Disposition index <sup>c</sup>                            | 8,170    | 163.4   | 71.9    | 34.0     | 1,304.6  |

mM, millimolar; OGTT, oral glucose tolerance test; pM, picomolar; AUC, area under the curve

<sup>a</sup> Early-phase: 0 to 30 minute of an OGTT

<sup>b</sup> Late-phase: 30 to 120 minute of an OGTT

<sup>c</sup> See Online Methods for definitions and references

**Supplementary Table 2. Numbers of exome chip variants passing QC that are variable in 8,229 non-diabetic METSIM study participants**

|                            | Total  | MAF                           |                             |                             | Present in NHGRI GWAS catalog <sup>a</sup> | Variants included in               |                             |                             |
|----------------------------|--------|-------------------------------|-----------------------------|-----------------------------|--------------------------------------------|------------------------------------|-----------------------------|-----------------------------|
|                            |        | < 0.5%                        | 0.5% to 5%                  | > 5%                        |                                            | single-variant tests (MAF > 0.05%) | gene-based tests (MAF < 1%) | gene-based tests (MAF < 3%) |
| Nonsynonymous <sup>b</sup> | 69,246 | 43,944                        | 13,311                      | 11,991                      | 187                                        | 40,801                             | 48,295                      | 54,764                      |
|                            |        | (B=20,521; P=7,110; D=14,706) | (B=6,969; P=1,992; D=3,662) | (B=8,526; P=1,246; D=1,591) |                                            |                                    |                             |                             |
|                            |        | (N=29,611; C=13,624)          | (N=9,726; C=3,305)          | (N=10,408; C=1,408)         |                                            |                                    |                             |                             |
| Stop-introducing           | 1,152  | 926                           | 151                         | 75                          | 3                                          | 511                                | 989                         | 1,054                       |
| Stop losses                | 67     | 43                            | 7                           | 17                          | 0                                          | 43                                 | 46                          | 49                          |
| Splice-site-disrupting     | 612    | 424                           | 151                         | 75                          | 7                                          | 344                                | 452                         | 493                         |
| Synonymous                 | 2,972  | 1,545                         | 563                         | 864                         | 47                                         | 1,939                              | -                           | -                           |
| Other                      | 15,815 | 840                           | 1,182                       | 13,793                      | 4,037                                      | 15,391                             | -                           | -                           |
| Total                      | 89,864 | 47,722                        | 15,295                      | 26,847                      | 4,281                                      | 59,029                             | 52,535                      | 59,901                      |

Number of monomorphic variants is 152,207 (62.9% of 242,071 variants passing QC and with Hardy-Weinberg equilibrium  $P$  value  $> 10^{-6}$ ). Variants were annotated relative to GENCODE version 7 transcripts<sup>1</sup>.

<sup>a</sup> <http://www.genome.gov/gwastudies> (accessed 17 June 2012)

<sup>b</sup> For nonsynonymous variants, for each frequency category, the number of variants predicted to be benign (B), possibly damaging (P) and probably damaging (D) based on PolyPhen-2 scores<sup>2</sup> (where available) are given. Also given are the number of variants predicted to be at non-conserved sites (N) and conserved sites (C) based on the PhyloP score<sup>3</sup> (where available). Variants with a PhyloP score  $> 3$  were considered to be conserved.

**Supplementary Table 3. Evidence for association with fasting proinsulin in 8,224 METSIM study participants at loci previously identified by genome-wide association studies**

| SNP                    | Nearby gene(s)         | Chr | Position (bp) | Minor/major allele | MAF  | $\hat{\beta} \pm SE$ | Effect size in SD units $\pm SE$ | Proportion of trait variance explained | <i>P</i> value        |
|------------------------|------------------------|-----|---------------|--------------------|------|----------------------|----------------------------------|----------------------------------------|-----------------------|
| rs11603334             | <i>ARAP1</i>           | 11  | 72,432,985    | A/G                | .253 | .081 $\pm$ .006      | .26 $\pm$ .02                    | .0259                                  | $6.1 \times 10^{-45}$ |
| rs7944584 <sup>a</sup> | <i>MADD</i>            | 11  | 47,336,320    | T/A                | .181 | -.065 $\pm$ .006     | -.21 $\pm$ .02                   | .0131                                  | $4.9 \times 10^{-25}$ |
| rs7172432 <sup>b</sup> | <i>VPS13C/C2CD4A/B</i> | 15  | 62,396,389    | A/G                | .446 | .042 $\pm$ .005      | .14 $\pm$ .02                    | .0091                                  | $7.4 \times 10^{-18}$ |
| rs11558471             | <i>SLC30A8</i>         | 8   | 118,185,733   | G/A                | .398 | -.036 $\pm$ .005     | -.12 $\pm$ .02                   | .0064                                  | $1.3 \times 10^{-12}$ |
| rs1051006 <sup>c</sup> | <i>MADD</i>            | 11  | 47,306,585    | A/G                | .310 | -.031 $\pm$ .006     | -.10 $\pm$ .02                   | .0043                                  | $2.7 \times 10^{-8}$  |
| rs6235                 | <i>PCSK1</i>           | 5   | 95,728,898    | G/C                | .282 | .031 $\pm$ .005      | .10 $\pm$ .02                    | .0040                                  | $2.3 \times 10^{-8}$  |
| rs7903146              | <i>TCF7L2</i>          | 10  | 11,4758,349   | T/C                | .177 | .027 $\pm$ .006      | .09 $\pm$ .02                    | .0022                                  | $3.0 \times 10^{-5}$  |
| rs1549318              | <i>LARP6</i>           | 15  | 71,109,147    | T/C                | .495 | .015 $\pm$ .005      | .05 $\pm$ .02                    | .0011                                  | .0031                 |
| rs4790333              | <i>SGSM2</i>           | 17  | 2,262,703     | C/T                | .472 | -.013 $\pm$ .005     | -.04 $\pm$ .02                   | .0009                                  | .0076                 |
| rs9727115 <sup>d</sup> | <i>SNX7</i>            | 1   | 99,177,253    | A/G                | .311 | -.007 $\pm$ .005     | -.02 $\pm$ .02                   | .0002                                  | .18                   |

Chr, chromosome; MAF, minor allele frequency. Positions are from NCBI Build 37 with allele labels from the forward strand. Fasting proinsulin levels were log-transformed and adjusted for fasting insulin, BMI, age, and age<sup>2</sup>. Effects are reported for the minor allele.  $\hat{\beta}$  coefficient units are ln(pmol/l). Results are given for the SNPs reported in Strawbridge et al.<sup>4</sup> or proxies thereof. For comparison, effect size in SD units ( $\pm SE$ ) and proportion of trait variance explained for the low-frequency variants shown in Table 2 are as follows: rs150781447 (TBC1D30), 0.38 ( $\pm 0.06$ ) and 0.0056, respectively; rs3824420 (KANK1), 0.26 ( $\pm 0.05$ ) and 0.0040, respectively.

<sup>a</sup> Proxy of discovery SNP rs10501320 ( $D' = .996$ ;  $r^2 = .959$ )

<sup>b</sup> Proxy of discovery SNP rs4502156 ( $D' = .986$ ;  $r^2 = .926$ )

<sup>c</sup> Proxy of discovery SNP rs10838687 ( $D' = 1.000$ ;  $r^2 = .798$ ). In Strawbridge et al., this variant only reached significance after adjusting for the lead SNP rs7944584. Reported effect sizes and *P* value are for the adjusted analysis.

<sup>d</sup> In Strawbridge et al., rs9727115 only reached significance after adjusting for fasting glucose. The *P* value after adjusting for fasting glucose is .58.

**Supplementary Table 4. Results of conditional analyses for fasting proinsulin for SNPs with association  $P$  value  $< 1 \times 10^{-4}$  after conditioning on the lead SNP(s) from GWAS-identified signals**

| Locus        | Chr       | Position (bp) | SNP               | SNP type | Minor/<br>major allele | MAF       | Unadjusted $P$ value  | Conditional analysis  |                    |                       |       |       |                            |                                  |
|--------------|-----------|---------------|-------------------|----------|------------------------|-----------|-----------------------|-----------------------|--------------------|-----------------------|-------|-------|----------------------------|----------------------------------|
|              |           |               |                   |          |                        |           |                       | Conditioning SNP(s)   | $\hat{\beta}$ (SE) | $P$ value             | $D'$  | $r^2$ | Allele couple <sup>a</sup> | Association pattern <sup>b</sup> |
| <i>SGSM2</i> | 17        | 2,282,779     | <b>rs61741902</b> | nonsyn   | A/G                    | .014      | $8.9 \times 10^{-10}$ | rs4790333             | 0.128<br>(0.021)   | $4.8 \times 10^{-10}$ | .301  | .001  | G,T                        |                                  |
|              |           | 2,262,703     | rs4790333         | intronic | C/T                    | .472      | .0076                 | <b>rs61741902</b>     | -0.014<br>(0.005)  | .0039                 |       |       |                            |                                  |
| <i>MADD</i>  | 11        | 47,306,630    | <b>rs35233100</b> | nonsyn   | T/C                    | .037      | $7.6 \times 10^{-15}$ | rs7944584             | -0.054<br>(0.014)  | .0001                 | 1.000 | .174  | C,A                        | ↓ pair                           |
|              |           | 47,336,320    | rs7944584         | intronic | T/A                    | .181      | $4.9 \times 10^{-25}$ | <b>rs35233100</b>     | -0.054<br>(0.007)  | $5.7 \times 10^{-15}$ |       |       |                            |                                  |
|              |           | 47,306,630    | <b>rs35233100</b> | nonsense | T/C                    | .037      | $7.6 \times 10^{-15}$ | rs1051006             | -0.105<br>(0.013)  | $5.0 \times 10^{-16}$ | 1.000 | .017  | T,G                        | ↑ pair                           |
|              |           | 47,306,585    | rs1051006         | nonsyn   | A/G                    | .310      | .033                  | <b>rs35233100</b>     | -0.017<br>(0.005)  | .0016                 |       |       |                            |                                  |
|              |           | 47,306,585    | rs1051006         | nonsyn   | A/G                    | .310      | .033                  | rs7944584             | -0.031<br>(0.006)  | $2.7 \times 10^{-8}$  | 1.000 | .099  | G,T                        | ↑ pair                           |
|              |           | 47,336,320    | rs7944584         | intronic | T/A                    | .181      | $4.9 \times 10^{-25}$ | rs1051006             | -0.076<br>(0.007)  | $8.3 \times 10^{-31}$ |       |       |                            |                                  |
|              |           | 47,306,630    | <b>rs35233100</b> | nonsense | T/C                    | .037      | $7.6 \times 10^{-15}$ | rs7944584             | -0.054<br>(0.014)  | .0001                 |       |       |                            |                                  |
|              |           | 47,306,585    | rs1051006         | nonsyn   | A/G                    | .310      | .033                  | rs7944584             | -0.031<br>(0.006)  | $2.7 \times 10^{-8}$  |       |       |                            |                                  |
| 47,336,320   | rs7944584 | intronic      | T/A               | .181     | $4.9 \times 10^{-25}$  | rs1051006 | -0.065<br>(0.007)     | $1.3 \times 10^{-19}$ |                    |                       |       |       |                            |                                  |

Chr, chromosome; MAF, minor allele frequency; SE, standard error; nonsyn, nonsynonymous.

Positions are from NCBI Build 37 with allele labels from the forward strand. Fasting proinsulin was log-transformed and adjusted for fasting insulin, BMI, age, and age<sup>2</sup>. For conditional analysis, common SNP(s) representing GWAS signals are those reported by Strawbridge et al. (2010) and low-frequency nonsynonymous SNPs are those identified in this study. **Nonsynonymous SNPs with MAF < 5% are bolded.** Effects are for the conditional analysis and are reported for the minor allele.  $\hat{\beta}$  coefficient units are ln(pmol/l). Sample sizes for these analyses ranged from 8,221 to 8,224. The LD metrics between SNP pairs  $D'$  and  $r^2$  were estimated in 9,633 METSIM individuals passing genotype quality control.

<sup>a</sup> Allele couple: positively associated alleles.

<sup>b</sup> Up arrow indicates a SNP pair for which significance increases after conditioning on the other SNP, down arrow indicates the opposite.

**Supplementary Table 5. Protein annotations of low frequency SNPs associated with insulin secretion traits**

| SNP<br>(chr:pos)                | Gene           | Amino<br>acid<br>change | Location | Transcript        | UniProt ID      | PolyPhen-2<br>score <sup>a</sup> | SIFT<br>score <sup>b</sup> | PhastCons<br>score <sup>c</sup><br>(mammal/<br>vertebrate) | Additional annotations                                                                      |
|---------------------------------|----------------|-------------------------|----------|-------------------|-----------------|----------------------------------|----------------------------|------------------------------------------------------------|---------------------------------------------------------------------------------------------|
| rs61741902<br>(chr17:2282779)   | <i>SGSM2</i>   | V996I                   | Exon 23  | ENST00000426855.1 | <b>O43147-1</b> | .605 (P)                         | -                          | 1/1                                                        | Located 30 amino acids from the Rab-GTPase Activating Protein TBC (Tre-2/Bub2/Cdc16) domain |
|                                 |                | V104II                  | Exon 24  | ENST00000268989.3 | <b>O43147-2</b> | .338 (B)                         | .06 (T)                    |                                                            |                                                                                             |
| rs150781447<br>(chr12:65224220) | <i>TBC1D30</i> | R279C                   | Exon 5   | ENST00000229088.6 | <b>Q9Y219-1</b> | 1.0(D)                           | -                          | .94/.94                                                    | In Rab-GTPase Activating Protein TBC (Tre-2/Bub2/Cdc16) domain                              |
|                                 |                | R116C                   | Exon 4   | ENST00000539867.1 | <b>Q9Y219-2</b> | 1.0(D)                           | -                          |                                                            |                                                                                             |
|                                 |                | R116C                   | Exon 4   | ENST00000455166.1 | <b>Q9Y219-3</b> | 1.0(D)                           | -                          |                                                            |                                                                                             |
|                                 |                | R127C                   | Exon 5   | ENST00000544190.1 | F5GY74          | -                                | -                          |                                                            |                                                                                             |
|                                 |                | R2C                     | Exon 5   | ENST00000542120.1 | F8VZ81          | -                                | -                          | First coding exon; may interfere with Kozak sequence       |                                                                                             |
|                                 |                | R2C                     | Exon 5   | ENST00000539120.1 | F5H7L7          | -                                | -                          |                                                            |                                                                                             |
|                                 |                | -                       | Intron 3 | ENST00000544457.1 | F5H0E8          | -                                | -                          |                                                            |                                                                                             |
| rs3824420<br>(chr9:712766)      | <i>KANK1</i>   | -                       | Intron 3 | ENST00000411580.2 | E7ES83          | -                                | -                          |                                                            |                                                                                             |
|                                 |                | R667H                   | Exon 3   | ENST00000354485.5 | Q5W0W1          | 0 (B)                            | .31(T)                     | .25/.04                                                    |                                                                                             |
|                                 |                | R667H                   | Exon 7   | ENST00000382303.1 | <b>Q14678-1</b> | .001 (B)                         | -                          |                                                            |                                                                                             |
|                                 |                | R667H                   | Exon 3   | ENST00000382297.2 | <b>Q14678-1</b> | .001 (B)                         | -                          |                                                            |                                                                                             |
|                                 |                | R509H                   | Exon 2   | ENST00000382293.3 | <b>Q14678-2</b> | -                                | -                          |                                                            |                                                                                             |
|                                 |                | -                       | 5'UTR    | ENST00000397976.1 | F5H7I5          | -                                | -                          |                                                            |                                                                                             |
| rs35658696<br>(chr5:102338811)  | <i>PAM</i>     | -                       | 5'UTR    | ENST00000489369.1 | -               | -                                | -                          |                                                            |                                                                                             |
|                                 |                | D563G                   | Exon 16  | ENST00000438793.3 | P19021-1        | .986(D)                          | -                          | 1/1                                                        | In peptidyl-alpha-hydroxyglycine alpha-amidating lyase domain                               |
|                                 |                | D563G                   | Exon 16  | ENST00000346918.2 | P19021-4        | .984 (D)                         | -                          |                                                            |                                                                                             |
|                                 |                | D563G                   | Exon 16  | ENST00000304400.7 | P19021-5        | .992 (D)                         | -                          |                                                            |                                                                                             |
|                                 |                | D563G                   | Exon 16  | ENST00000455264.2 | P19021-3        | .958 (D)                         | -                          |                                                            |                                                                                             |
|                                 |                | D466G                   | Exon 15  | ENST00000274392.9 | F8WE90          | .984 (D)                         | .01(D)                     |                                                            |                                                                                             |
|                                 |                | D456G                   | Exon 15  | ENST00000348126.2 | P19021-2        | .992 (D)                         | -                          |                                                            |                                                                                             |
|                                 |                | D335G                   | Exon 8   | ENST00000379799.3 | H7BYD9          | .956 (D)                         | -                          |                                                            |                                                                                             |
|                                 |                | -                       | 5'UTR    | ENST00000511429.1 | -               | -                                | -                          |                                                            |                                                                                             |
| -                               | 5'UTR          | ENST00000379787.4       | A6NMH0   | -                 | -               |                                  |                            |                                                            |                                                                                             |
| rs36046591<br>(chr5:102537285)  | <i>PPIP5K2</i> | -                       | 3'UTR    | ENST00000345721.2 | F8W8D9          | -                                | -                          |                                                            |                                                                                             |
|                                 |                | S1207G                  | Exon 30  | ENST00000321521.8 | O43314-2        | 0 (B)                            | .43(T)                     | .9/.46                                                     |                                                                                             |
|                                 |                | S1228G                  | Exon 31  | ENST00000358359.3 | O43314-1        | 0 (B)                            | -                          |                                                            |                                                                                             |
|                                 |                | S1263G                  | Exon 33  | ENST00000451606.1 | E9PGM8          | 0 (B)                            | -                          |                                                            |                                                                                             |
|                                 |                | S1207G                  | Exon 29  | ENST00000414217.1 | O43314-2        | 0 (B)                            | -                          |                                                            |                                                                                             |
|                                 |                | S383G                   | Exon 10  | ENST00000509597.1 | H0Y9S9          | 0 (B)                            | -                          |                                                            |                                                                                             |
|                                 |                | -                       | 5'UTR    | ENST00000504083.1 | -               | -                                | -                          |                                                            |                                                                                             |
|                                 |                | -                       | 3'UTR    | ENST00000513500.1 | D6RFZ8          | -                                | -                          |                                                            |                                                                                             |

**Supplementary Table 5. (continued)**

| SNP                            | Gene        | Amino acid change | Location  | Transcript        | UniProt ID | PolyPhen-2 score <sup>a</sup> | SIFT score <sup>b</sup> | PhastCons score <sup>c</sup> (mammal/vertebrate) | Additional annotations                                                                                 |
|--------------------------------|-------------|-------------------|-----------|-------------------|------------|-------------------------------|-------------------------|--------------------------------------------------|--------------------------------------------------------------------------------------------------------|
| rs35233100<br>(chr11:47306630) | <i>MADD</i> | R766X             | Exon 13   | ENST00000342922.4 | Q8WVG6-3   | -                             | -                       | .92/.05                                          | Internal exon;<br>117 bp upstream of exon-intron<br>junction and may cause nonsense-<br>mediated decay |
|                                |             | R766X             | Exon 13   | ENST00000395336.3 | Q8WVG6-7   | -                             | -                       |                                                  |                                                                                                        |
|                                |             | R766X             | Exon 13   | ENST00000311027.5 | Q8WVG6-1   | -                             | -                       |                                                  |                                                                                                        |
|                                |             | R766X             | Exon 13   | ENST00000349238.3 | Q8WVG6-2   | -                             | -                       |                                                  |                                                                                                        |
|                                |             | R766X             | Exon 13   | ENST00000402192.2 | Q8WVG6-3   | -                             | -                       |                                                  |                                                                                                        |
|                                |             | -                 | Intron 13 | ENST00000407859.3 | Q8WVG6-4   | -                             | -                       |                                                  |                                                                                                        |
|                                |             | -                 | Intron 13 | ENST00000395342.2 | F8W9P9     | -                             | -                       |                                                  |                                                                                                        |
|                                |             | -                 | Intron 13 | ENST00000395344.3 | B5MEE5     | -                             | -                       |                                                  |                                                                                                        |
|                                |             | -                 | Intron 13 | ENST00000406482.1 | Q8WVG6-6   | -                             | -                       |                                                  |                                                                                                        |
|                                |             | -                 | Intron 13 | ENST00000402799.1 | Q8WVG6-5   | -                             | -                       |                                                  |                                                                                                        |
| -                              | 5'UTR       | ENST00000524530.1 | -         | -                 | -          |                               |                         |                                                  |                                                                                                        |

Each SNP is annotated with all isoforms based on the comprehensive set of GENCODE version 7 gene transcripts<sup>1</sup>.

<sup>a</sup> Polyphen-2 scores<sup>2</sup> (where available) range from 0 (B) to 1 (D). B=benign, P=possible damaging, D=probably damaging.

<sup>b</sup> SIFT scores<sup>5</sup> (where available) range from 0 (D) to 1 (T). All scores  $\leq .05$  are predicted to be damaging. T=tolerated, D=damaging.

<sup>c</sup> Average PhastCons score<sup>6</sup> for 3 codon nucleotides derived from alignments of 33 Mammals/46 Vertebrates. Scores range from 0 (not conserved) to 1 (very conserved). Data from UCSC genome browser.



**Supplementary Table 6. Association results for SNPs in the *MADD* gene region showing suggestive or significant association for fasting proinsulin before and after conditioning on the three associated variants at *MADD* (rs7944584, rs1051006, and rs35233100)**

| Locus         | Chr | Position (bp) | SNP        | Variant    | MAF  | <i>P</i> value        | Conditional <i>P</i> value <sup>a</sup> | rs7944584 <sup>b</sup> |                       | rs1051006 <sup>c</sup> |                       | rs35233100 <sup>d</sup> |                       |
|---------------|-----|---------------|------------|------------|------|-----------------------|-----------------------------------------|------------------------|-----------------------|------------------------|-----------------------|-------------------------|-----------------------|
|               |     |               |            |            |      |                       |                                         | <i>D'</i>              | <i>r</i> <sup>2</sup> | <i>D'</i>              | <i>r</i> <sup>2</sup> | <i>D'</i>               | <i>r</i> <sup>2</sup> |
| <i>OR5M11</i> | 11  | 56,310,222    | rs628524   | S171N      | .258 | $3.7 \times 10^{-6}$  | .11                                     | .029                   | .001                  | .406                   | .128                  | .620                    | .042                  |
| <i>ATG13</i>  | 11  | 46,690,413    | rs35619591 | G434R      | .030 | $6.1 \times 10^{-10}$ | .0005                                   | .970                   | .131                  | .970                   | .013                  | .599                    | .000                  |
| <i>AGBL2</i>  | 11  | 47,712,213    | rs7941404  | R349H      | .118 | $4.7 \times 10^{-21}$ | .0018                                   | .694                   | .293                  | .348                   | .007                  | .813                    | .189                  |
| <i>OR4S1</i>  | 11  | 48,333,360    | rs1483121  | intergenic | .112 | $3.8 \times 10^{-14}$ | .084                                    | .619                   | .220                  | .402                   | .009                  | .798                    | .193                  |

Chr, chromosome; MAF, minor allele frequency. Positions are from NCBI Build 37 with allele labels from the forward strand. Fasting proinsulin was log-transformed and adjusted for fasting insulin, BMI, age, and age<sup>2</sup>.

<sup>a</sup> *P* values after conditioning on the three variants rs7944584, rs1051006, and rs35233100 at *MADD*; <sup>b</sup> Lead SNP at *MADD*; <sup>c</sup> Lead SNP of secondary GWAS signal at *MADD*; <sup>d</sup> Nonsense variant at *MADD*. LD between *MADD* variants: rs7944584 - rs1051006 (*D'* = 1.000; *r*<sup>2</sup> = .099), rs7944584 - rs35233100 (*D'* = 1.000; *r*<sup>2</sup> = .174), and rs1051006 - rs35233100 (*D'* = 1.000; *r*<sup>2</sup> = .017). The LD metrics between SNP pairs *D'* and *r*<sup>2</sup> were estimated in 9,633 METSIM individuals passing genotype quality control.

**Supplementary Table 7. Minor allele frequencies of associated SNPs in other data sets**

| Gene           | SNP         | SNP type      | METSIM <sup>a</sup> | 1000G-EUR <sup>b</sup> | 1000G-ASN <sup>b</sup> | 1000G-AFR <sup>b</sup> | ESP-EA <sup>c</sup> | ESP-AA <sup>d</sup> |
|----------------|-------------|---------------|---------------------|------------------------|------------------------|------------------------|---------------------|---------------------|
| <i>SGSM2</i>   | rs61741902  | nonsynonymous | .014                | .012                   | 0                      | 0                      | .014                | .003                |
| <i>MADD</i>    | rs35233100  | nonsense      | .037                | .046                   | 0                      | .004                   | .063                | .012                |
| <i>TBC1D30</i> | rs150781447 | nonsynonymous | .020                | .015                   | 0                      | 0                      | 0                   | 0                   |
| <i>KANK1</i>   | rs3824420   | nonsynonymous | .029                | .005                   | .163                   | .043                   | .001                | .033                |
| <i>PAM</i>     | rs35658696  | nonsynonymous | .053                | .044                   | 0                      | .002                   | .049                | .007                |
| <i>PPIP5K2</i> | rs36046591  | nonsynonymous | .053                | .041                   | 0                      | .002                   | .048                | .008                |

<sup>a</sup> Based on 9,633 METSIM individuals who passed genotype quality control; <sup>b</sup> Based on 1000 Genomes Project phase 1 genotype data from ~379 European ancestry individuals (EUR), ~286 Asian ancestry individuals (ASN), and ~246 African ancestry individuals (AFR); <sup>c</sup> Based on ~4300 unrelated European-American individuals from the NHLBI Exome Sequencing Project (ESP); <sup>d</sup> Based on ~2203 unrelated African-Americans individuals from the NHLBI Exome Sequencing Project (ESP). Frequencies for ESP obtained from the Exome Variant Server (<http://evs.gs.washington.edu/EVS/>).

## SUPPLEMENTARY FIGURE LEGENDS

**Supplementary Figure 1** Associations across the 19 insulin processing, insulin secretion, and glycemic traits for low-frequency variants in *SGSM2*, *MADD*, *TBC1D30*, *KANK1*, and *PAM*. Bars represent  $-\log_{10} P$  value signed according to direction of effect. The effect allele is given and is the minor allele. For quantitative traits, results are based on 8,104 to 8,229 subjects and rows are ordered according to a complete linkage hierarchical clustering of traits based on the Pearson correlation matrix. Type 2 diabetes association results are based on 1,376 diabetic cases and 5,478 normal glycemic controls.

**Supplementary Figure 2** Distribution of primary traits for each genotype for the low-frequency variants in *SGSM2*, *MADD*, *TBC1D30*, *KANK1*, and *PAM*. Traits were log-transformed and adjusted for BMI, age, and age<sup>2</sup>. Fasting proinsulin was also adjusted for fasting insulin.

**Supplementary Figure 3** Manhattan plots for the insulinogenic index (a) and disposition index (b) association analyses. Association results of the single-variant analysis ( $-\log_{10} P$  values) are plotted against genomic position (NCBI Build 37). Loci previously associated with glycemic traits at genome-wide significance are denoted in blue and loci identified by the current study in red. Previously associated loci are based on Rung et al.<sup>7</sup>, Saxena et al.<sup>8</sup>, Dupuis et al.<sup>9</sup>, and Scott et al.<sup>10</sup>. Insulinogenic index and disposition index were log-transformed and adjusted for fasting insulin, BMI, age, and age<sup>2</sup>.

**Supplementary Figure 4** Quantile-quantile plots (QQ) for gene-based association analysis results for fasting proinsulin. Tests were performed using SKAT-O<sup>11</sup> on trait residuals obtained by adjusting log-transformed fasting proinsulin for fasting insulin, age, age<sup>2</sup>, and BMI, and for relatedness using GenABEL<sup>12</sup>. Results shown for variants with MAF < 3% (magenta) and MAF < 1% (gray).

**Supplementary Figure 5** Roles of described genes in G-protein signaling. SGSM2, MADD, TBC1D30 and KANK1 have been shown to regulate or function in G-protein signaling. GTP-binding proteins (G-proteins) are characterized by their ability to bind to and hydrolyze GTP and include members of the Rab, Rac, Rho, Rap, and other families. G-proteins are active when bound to GTP but inactive when bound to GDP. Guanine exchange factors (GEF's) catalyze the dissociation of GDP and the binding of GTP, thus promoting the active G-protein state. When bound to GTP, G-proteins remain active briefly and can activate or inactivate many other proteins. GTPase activator proteins (GAP's) turn off active G-proteins by promoting GTP hydrolysis and a return to the inactive state.

**Supplementary Figure 6** Pearson correlations between quantitative traits. Rows and columns are ordered according to a complete linkage hierarchical clustering of traits based on the Pearson correlation matrix.

**Supplementary Figure 7** Quantile-quantile (QQ) plots for single-variant analysis results of primary traits. Red dots correspond to all *P* values, blue dots to association results after removal of previously identified and novel genome-wide significant loci. Reported genomic control inflation factors were calculated after removal of previously identified and novel genome-wide significant loci.

**Supplementary Figure 8** Comparison of gene-based association analysis results ( $-\log_{10} P$  values) obtained by conducting tests using SKAT-O<sup>11</sup> on trait residuals unadjusted for relatedness versus trait residuals adjusted for relatedness using GenABEL<sup>12</sup>.

# Supplementary Figure 1

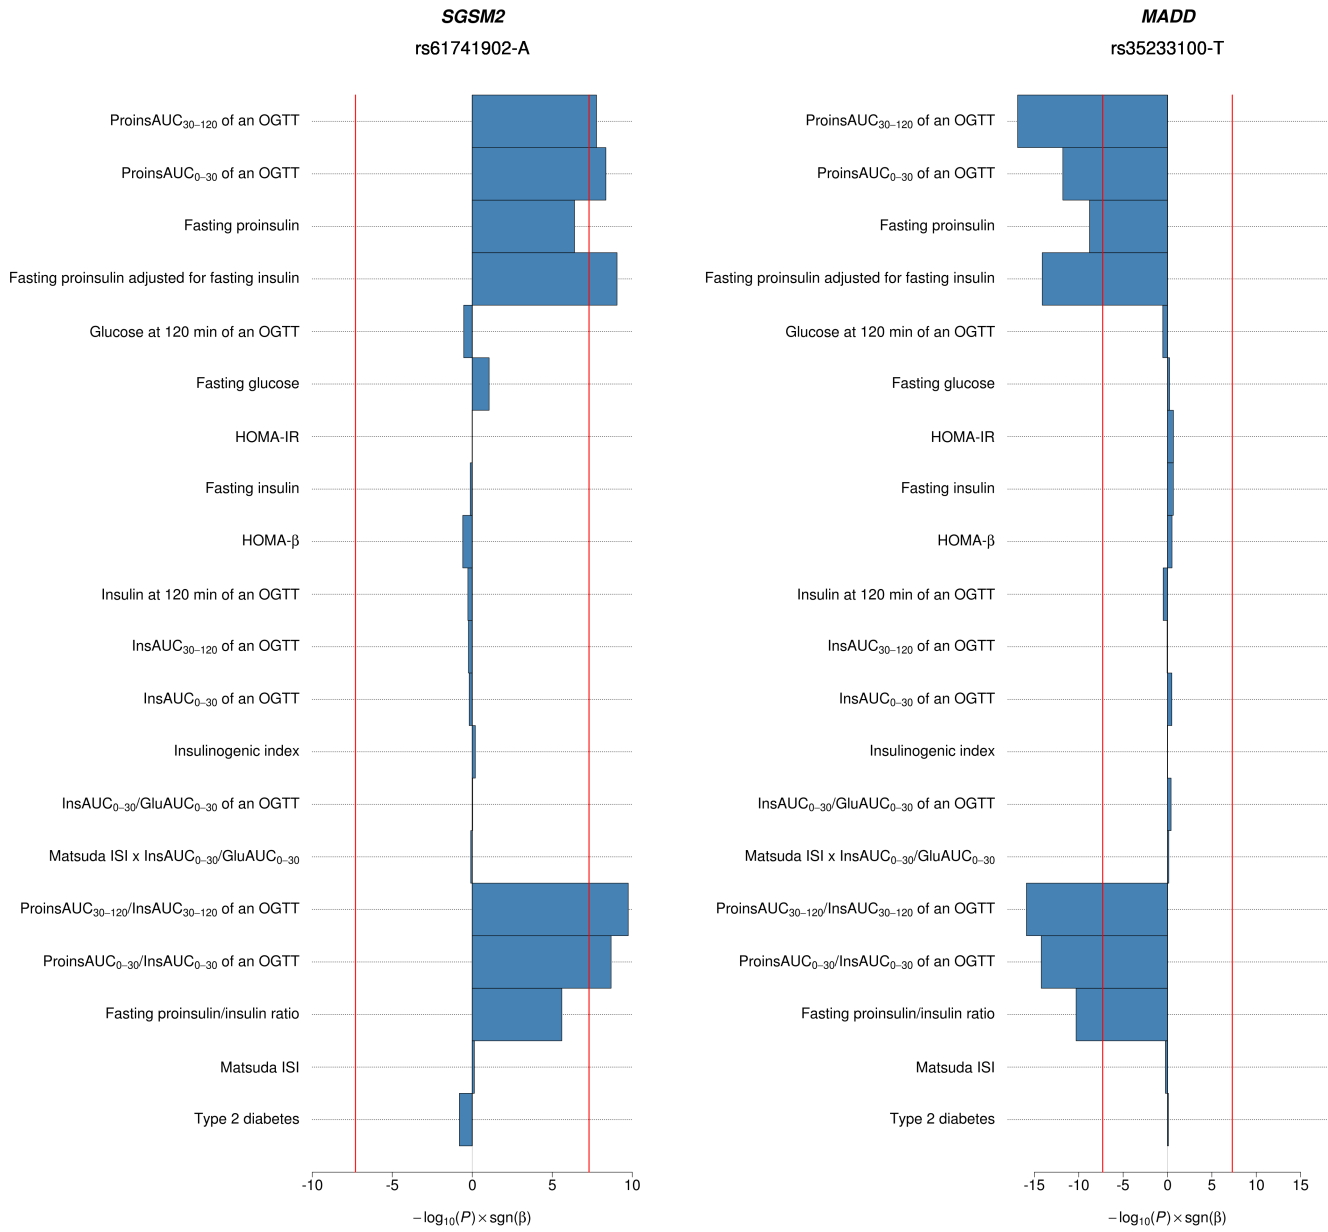

# Supplementary Figure 1 cont'd

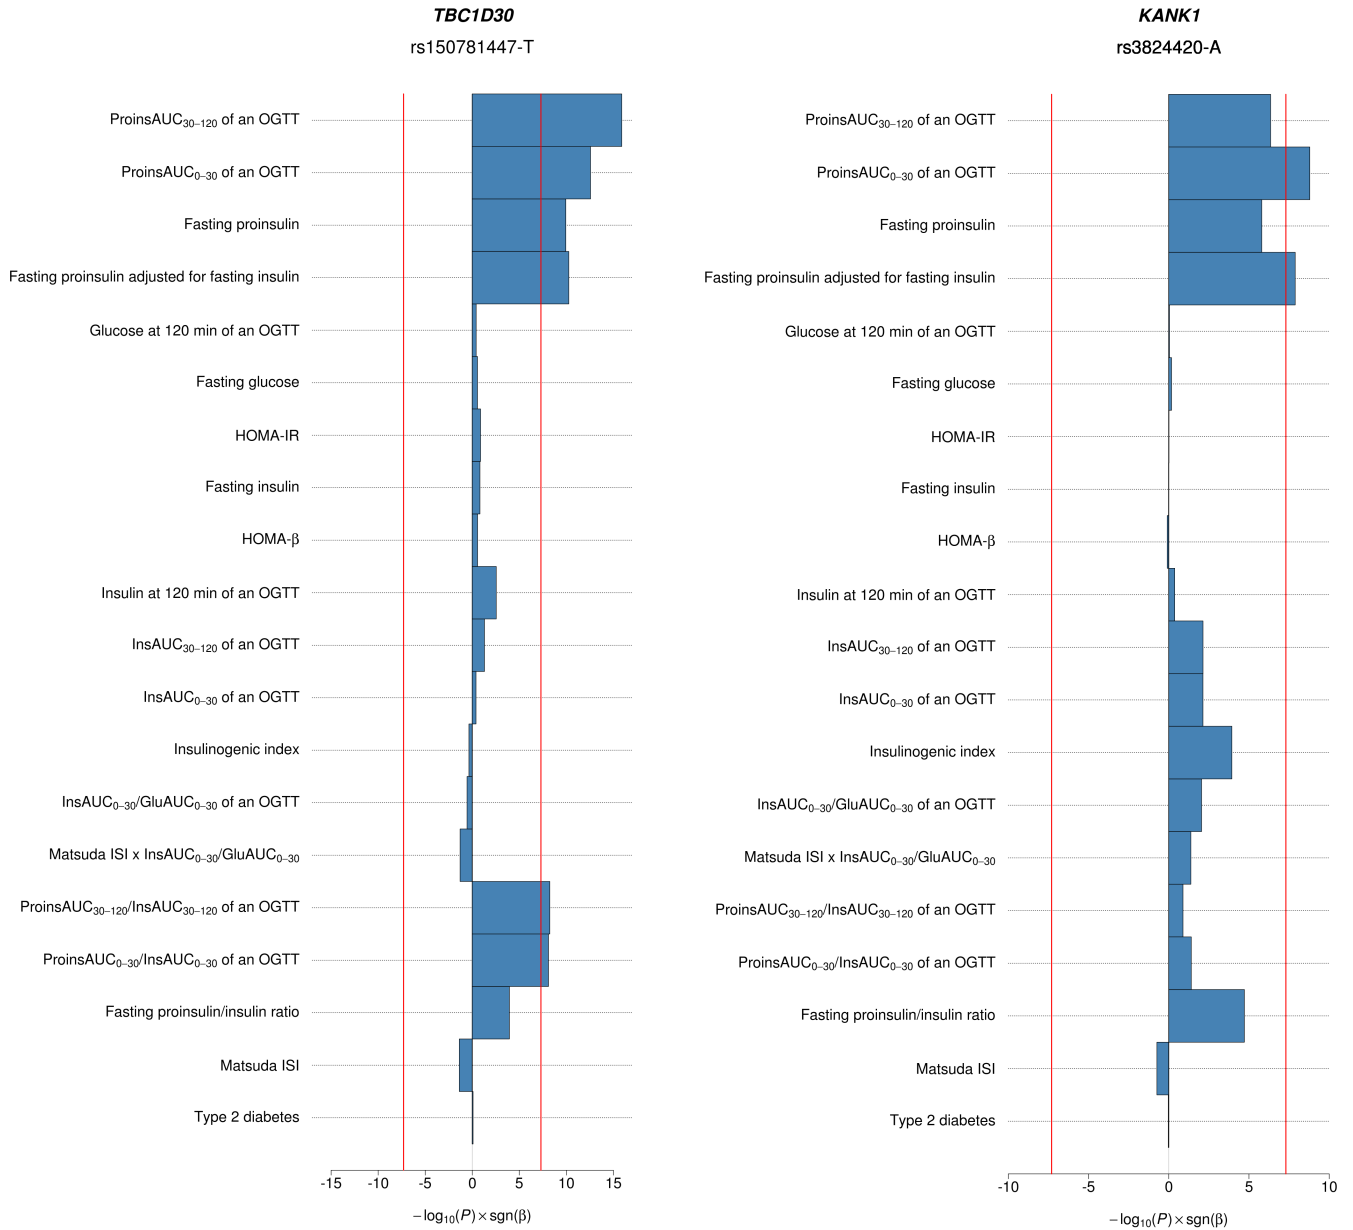

# Supplementary Figure 1 cont'd

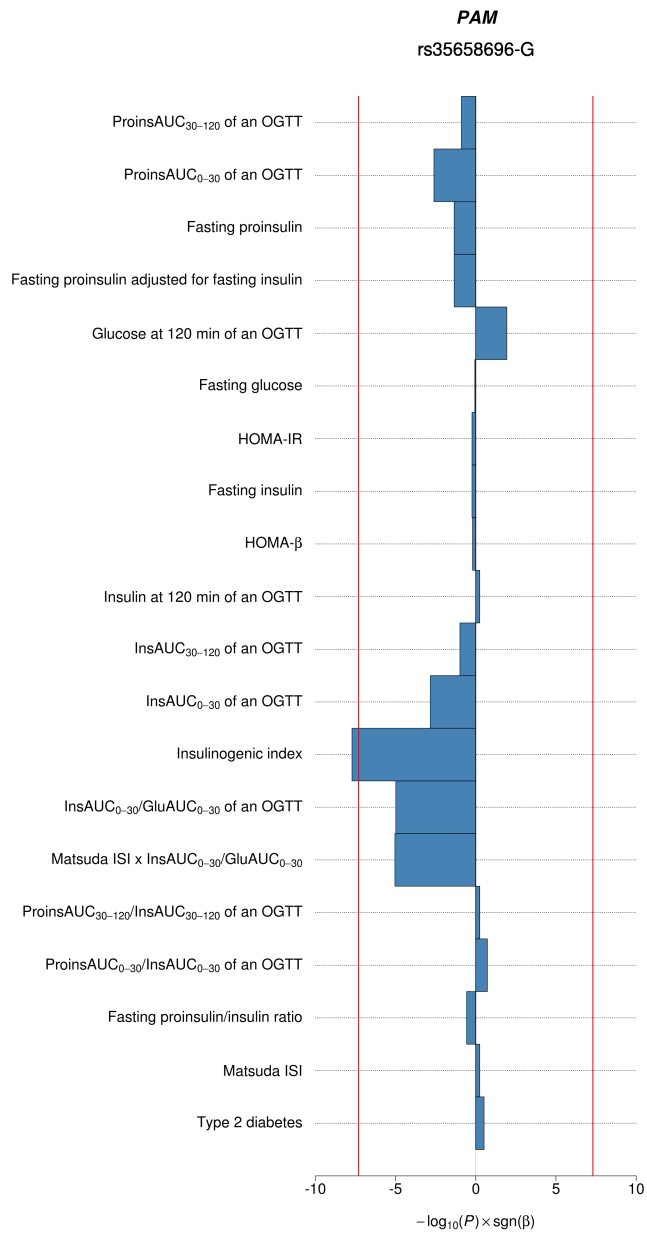

## Supplementary Figure 2

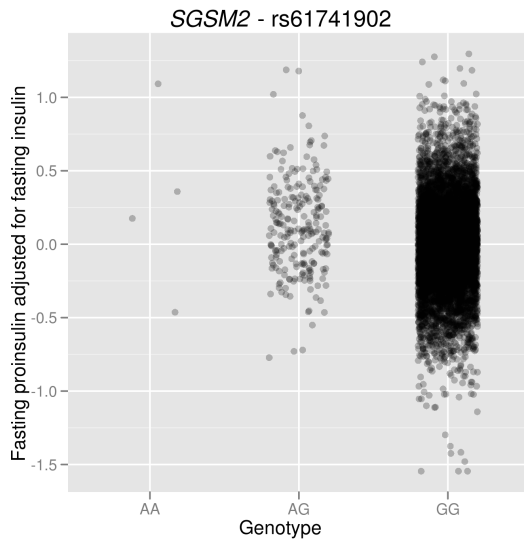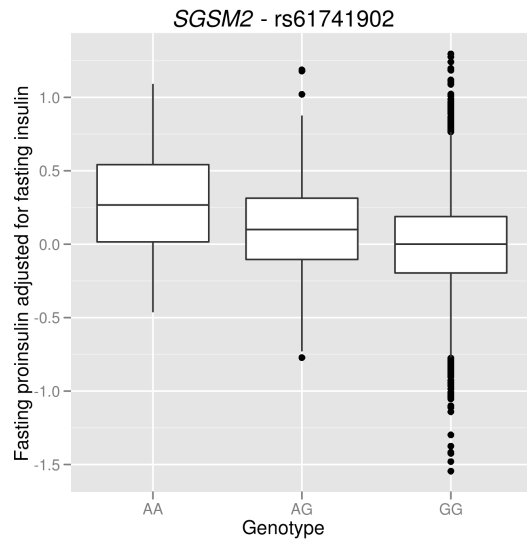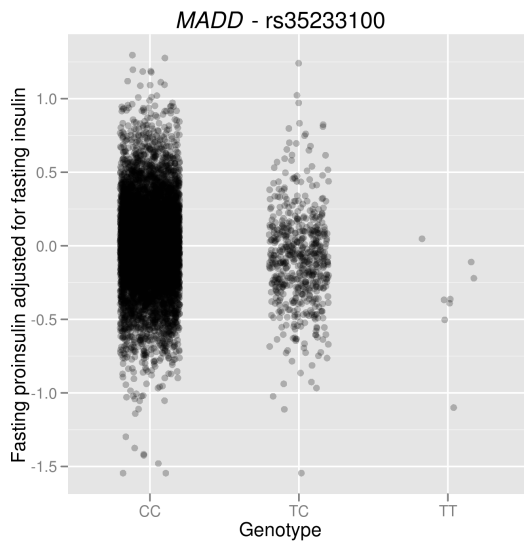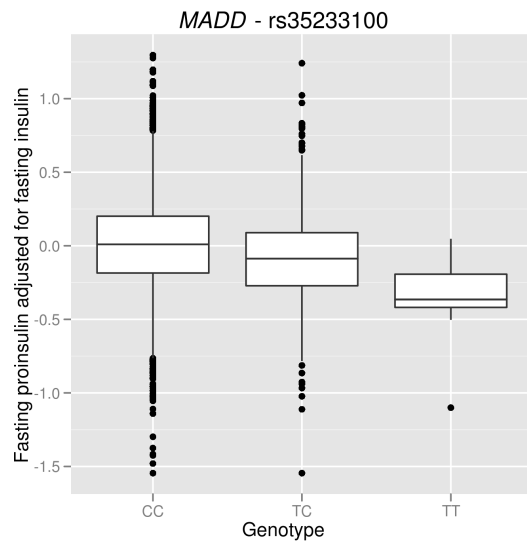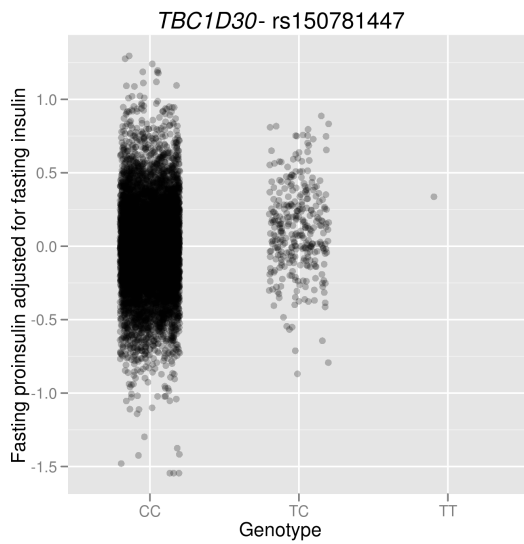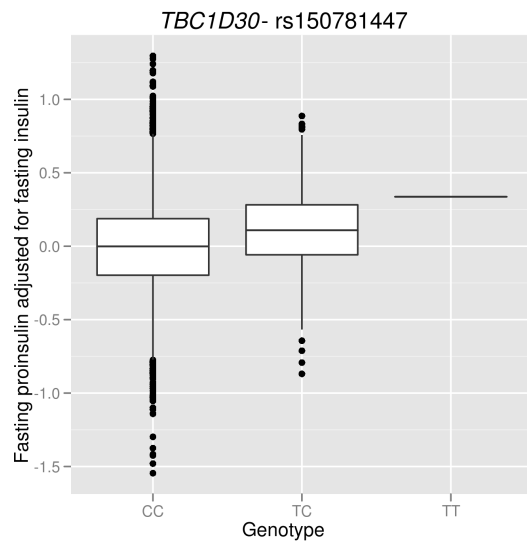



# Supplementary Figure 2 cont'd

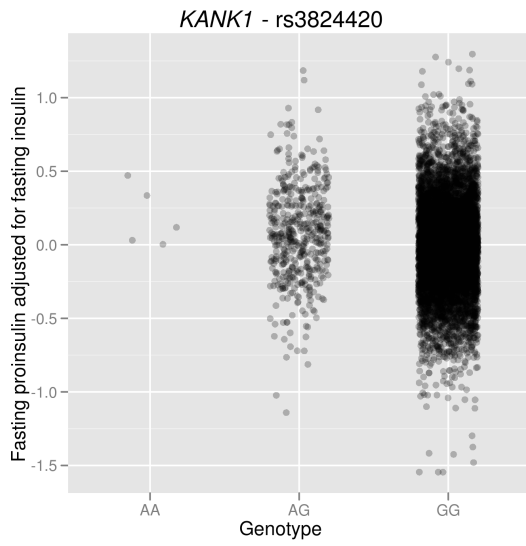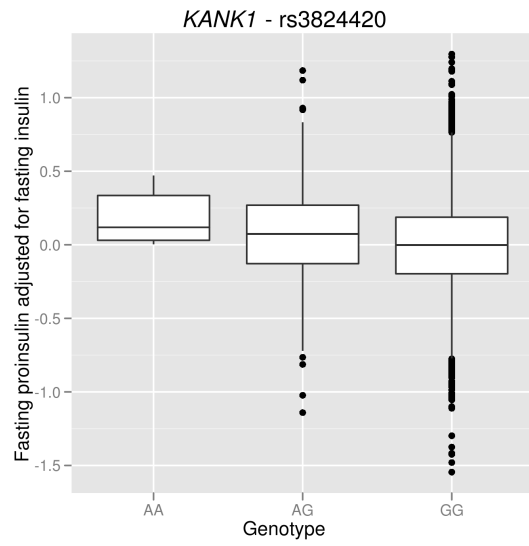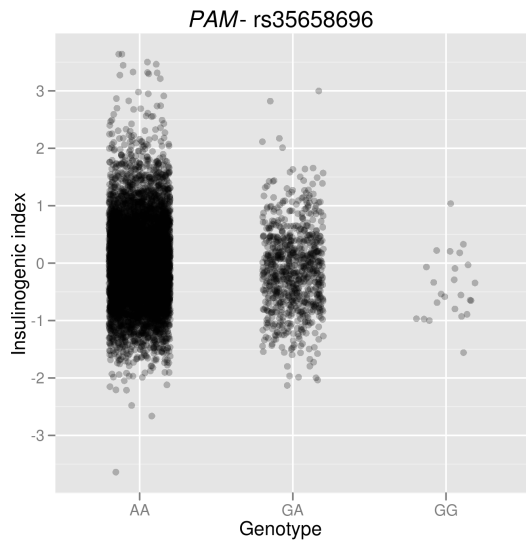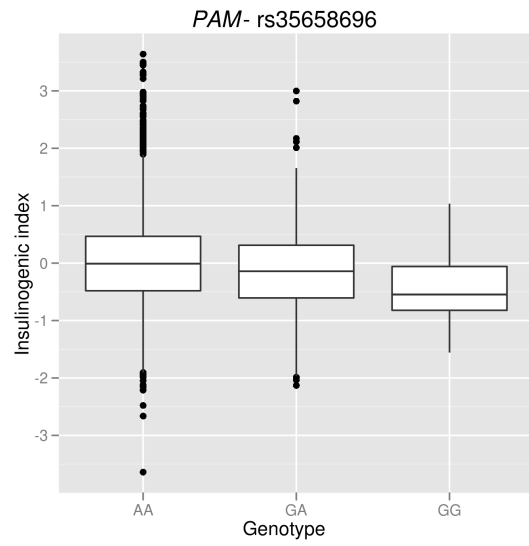

# Supplementary Figure 3

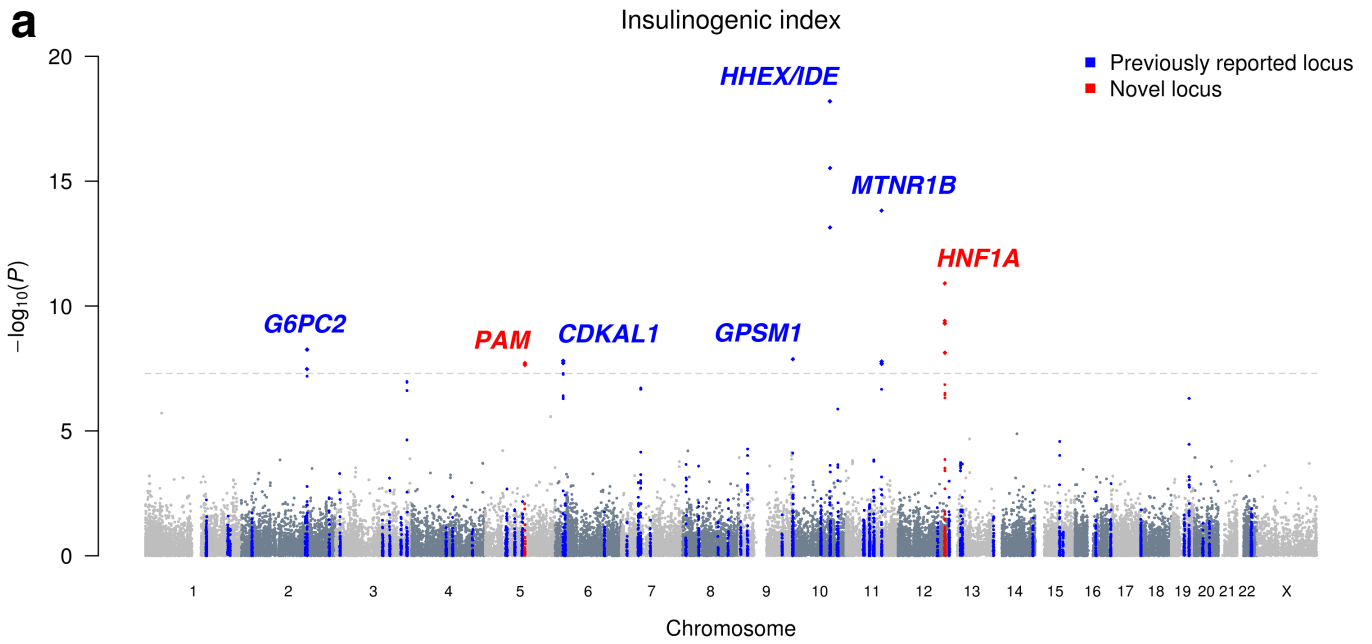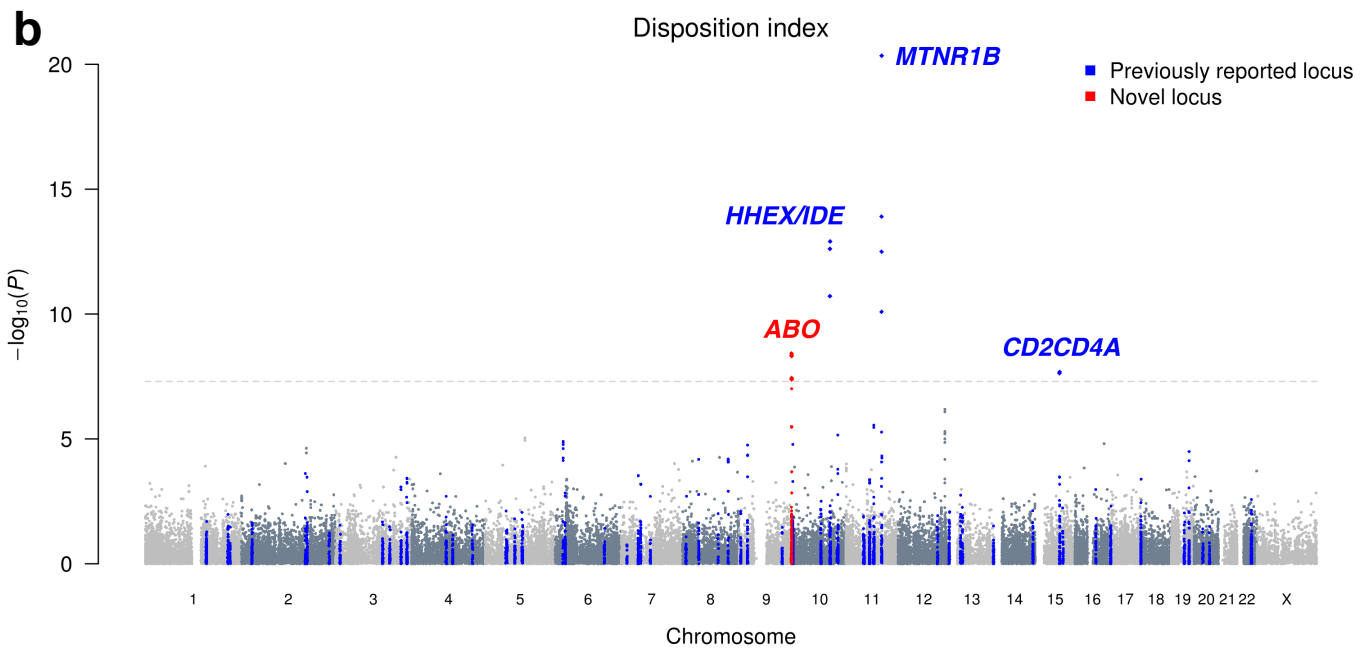

# Supplementary Figure 4

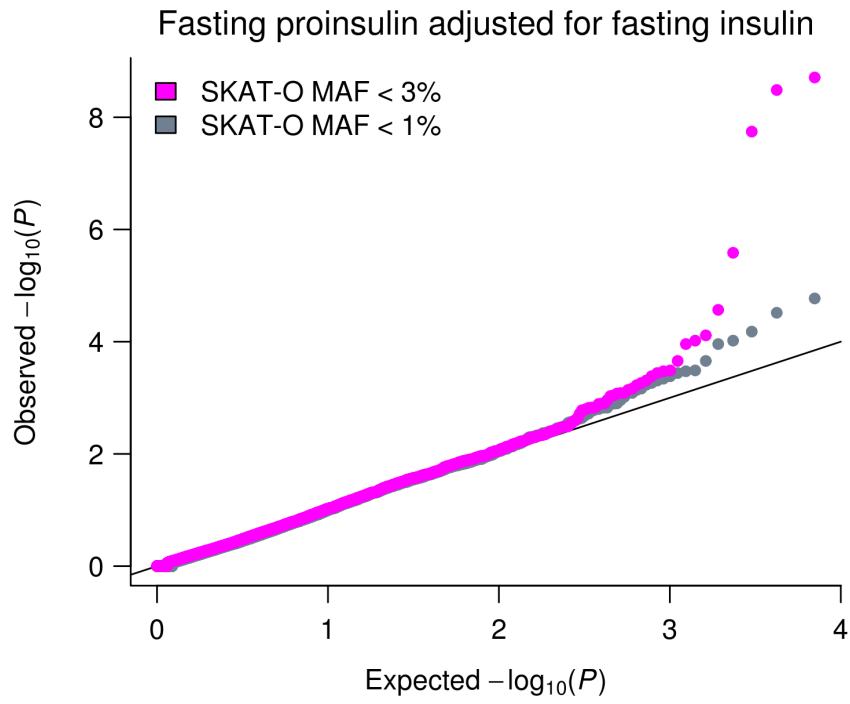

Supplementary Figure 5

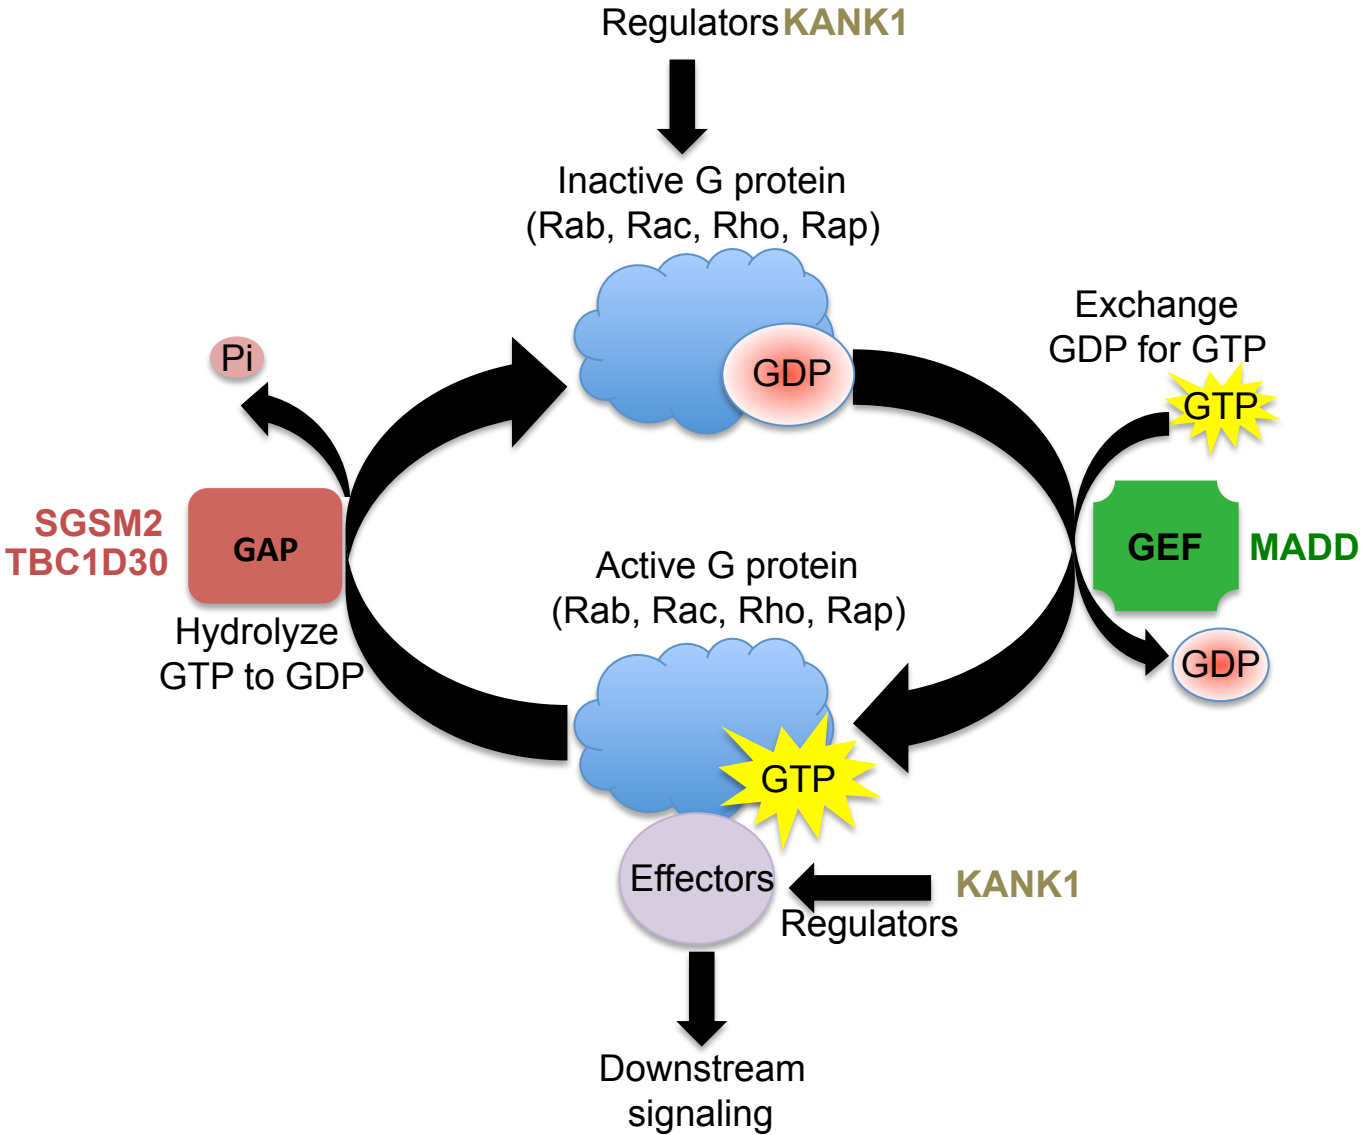

# Supplementary Figure 6

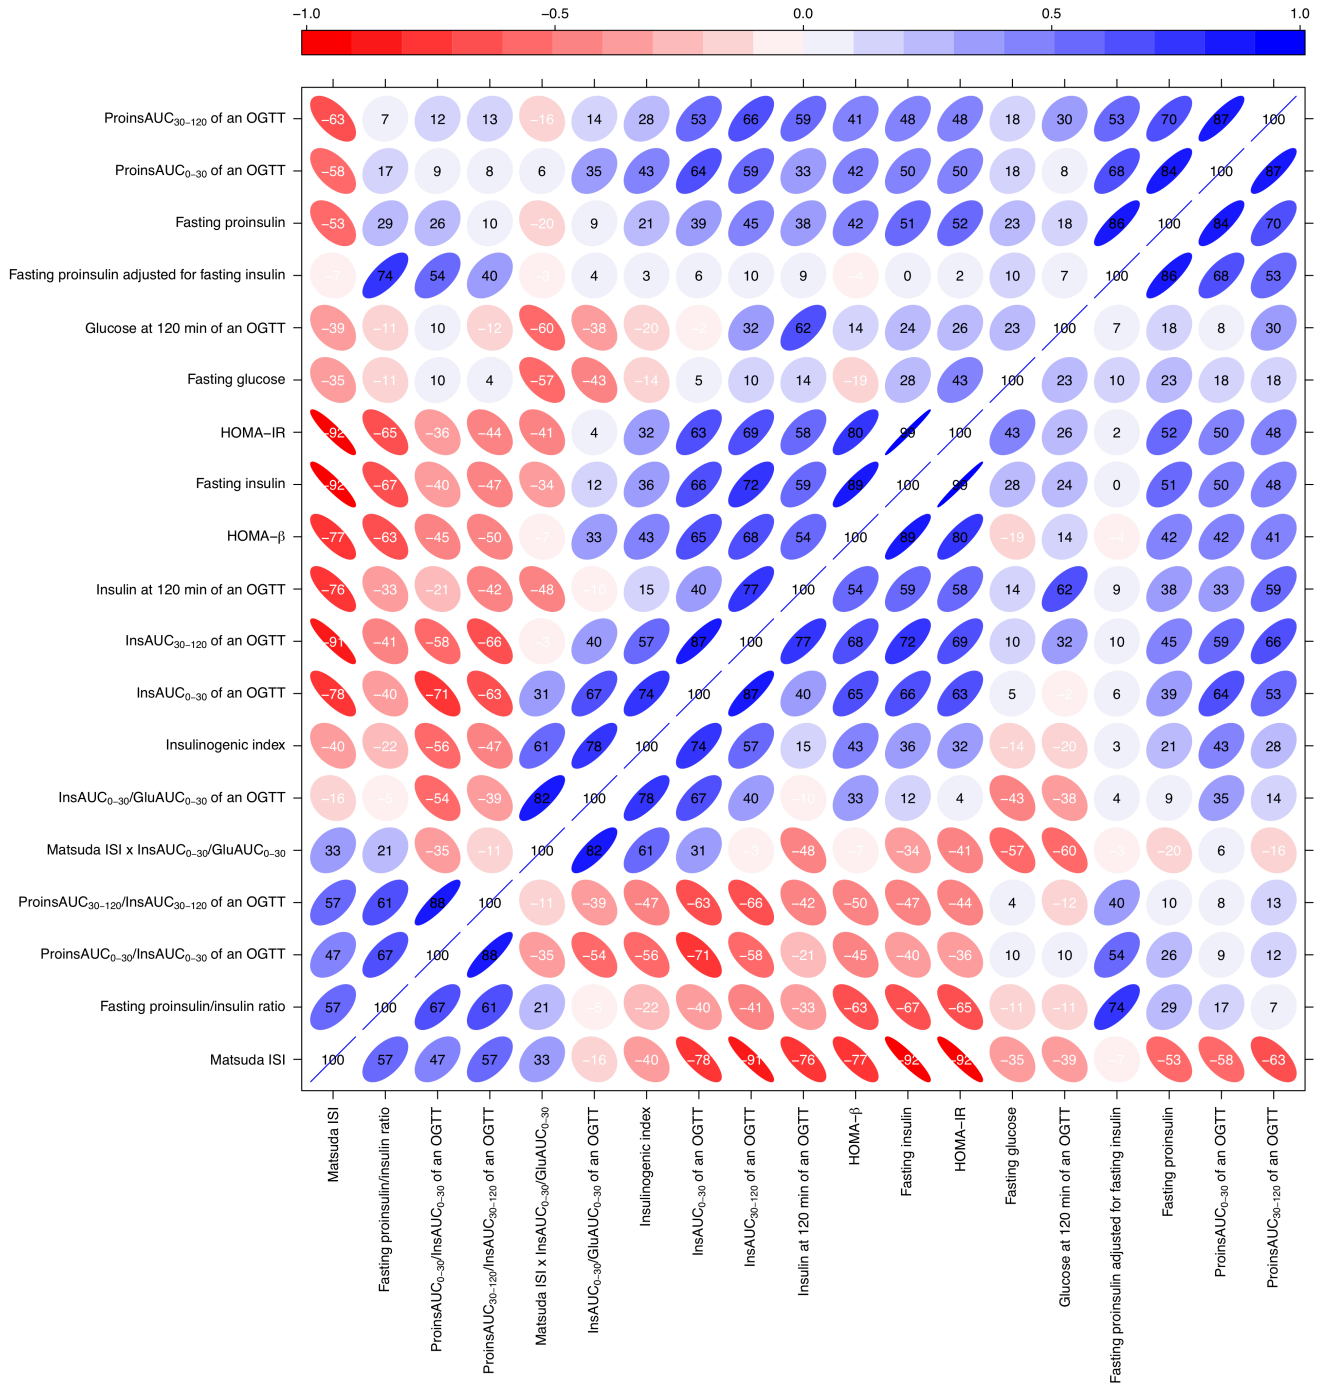

# Supplementary Figure 7

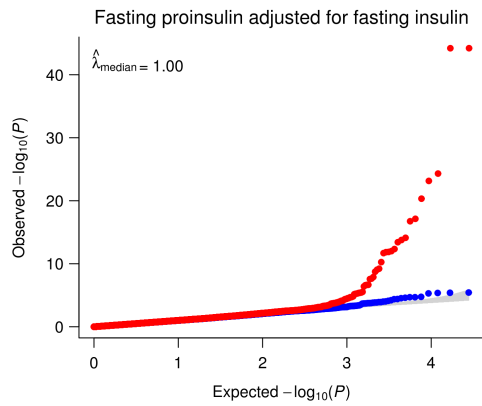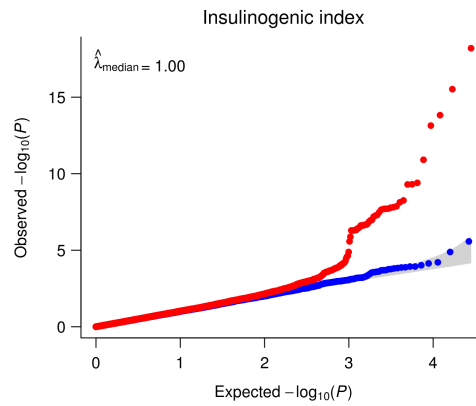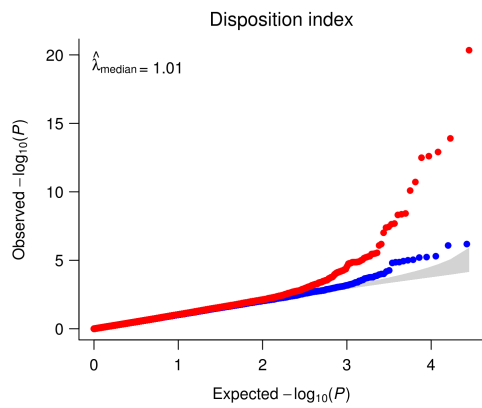

# Supplementary Figure 8

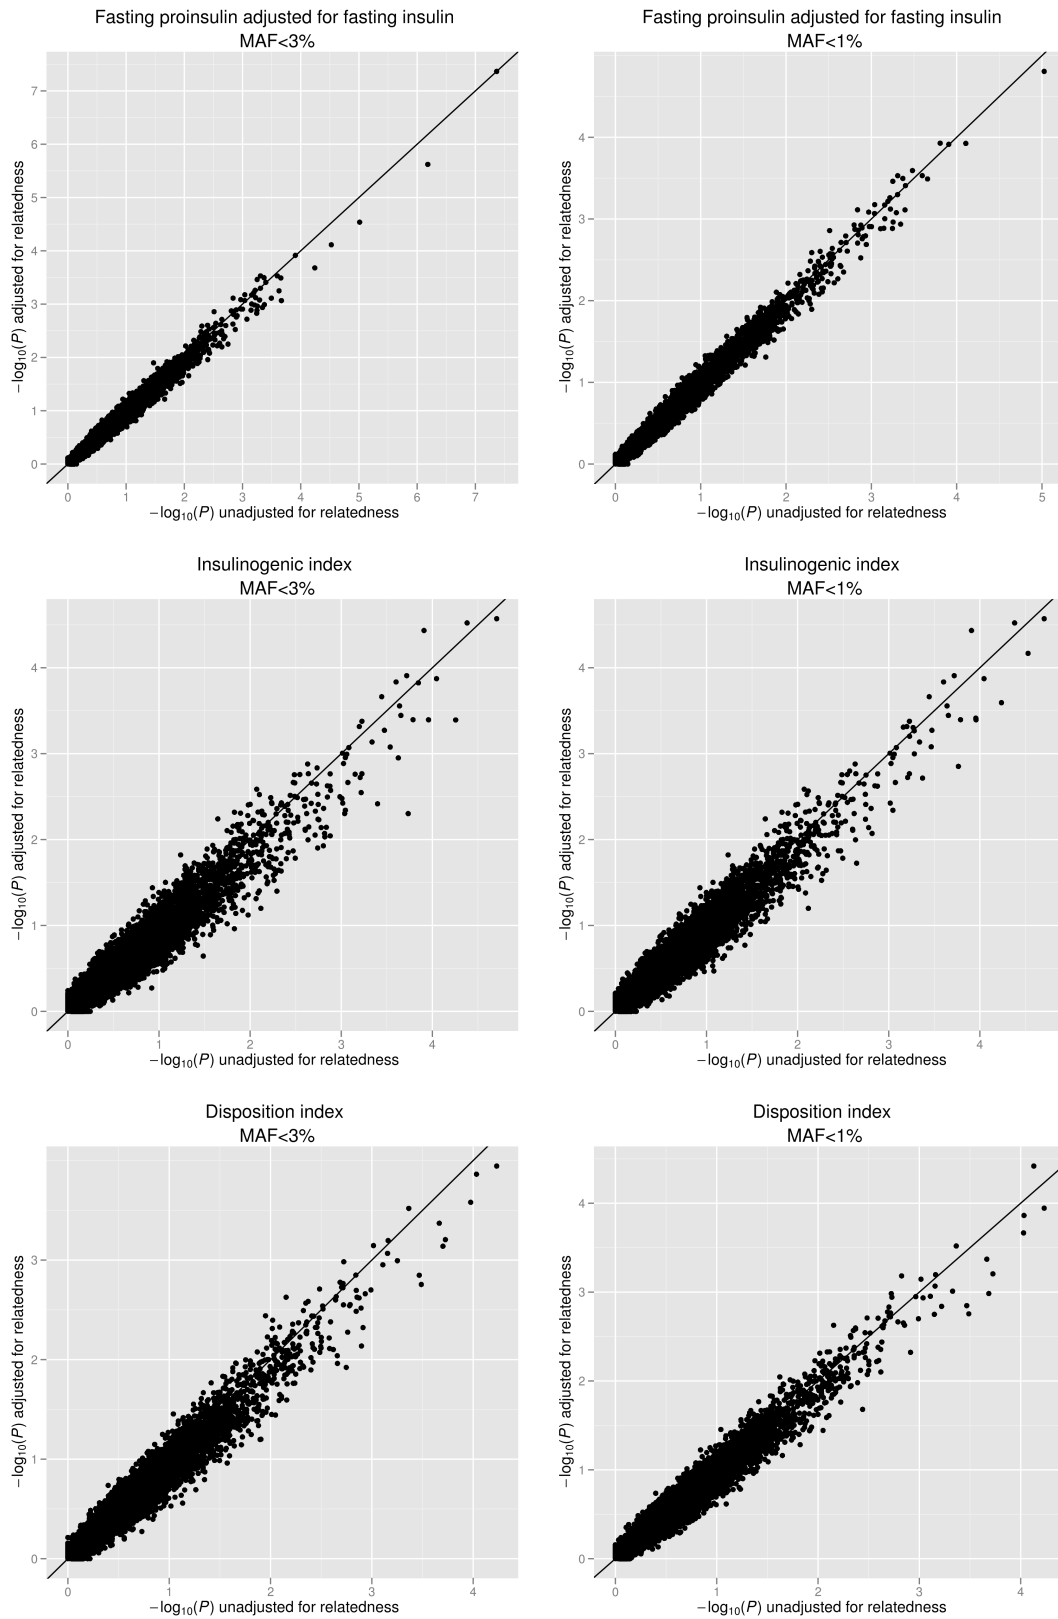

## SUPPLEMENTARY REFERENCES

1. Harrow, J. *et al.* GENCODE: producing a reference annotation for ENCODE. *Genome Biol* **7 Suppl 1**, S4 1-9 (2006).
2. Adzhubei, I.A. *et al.* A method and server for predicting damaging missense mutations. *Nat Methods* **7**, 248-9 (2010).
3. Cooper, G.M. *et al.* Distribution and intensity of constraint in mammalian genomic sequence. *Genome Res* **15**, 901-13 (2005).
4. Strawbridge, R.J. *et al.* Genome-wide association identifies nine common variants associated with fasting proinsulin levels and provides new insights into the pathophysiology of type 2 diabetes. *Diabetes* **60**, 2624-34 (2011).
5. Kumar, P., Henikoff, S. & Ng, P.C. Predicting the effects of coding non-synonymous variants on protein function using the SIFT algorithm. *Nat Protoc* **4**, 1073-81 (2009).
6. Siepel, A. & Haussler, D. Phylogenetic hidden Markov models. (2005). In R. Nielsen, ed., *Statistical Methods in Molecular Evolution*, pp. 325-351. Springer, New York.
7. Rung, J. *et al.* Genetic variant near IRS1 is associated with type 2 diabetes, insulin resistance and hyperinsulinemia. *Nat Genet* **41**, 1110-5 (2009).
8. Saxena, R. *et al.* Genetic variation in GIPR influences the glucose and insulin responses to an oral glucose challenge. *Nat Genet* **42**, 142-8 (2010).
9. Dupuis, J. *et al.* New genetic loci implicated in fasting glucose homeostasis and their impact on type 2 diabetes risk. *Nat Genet* **42**, 105-16 (2010).
10. Scott, R.A. *et al.* Large-scale association study using the Metabochip array reveals new loci influencing glycemic traits and provides insight into the underlying biological pathways. *Nat Genet* **44**, 991-1005 (2012).
11. Lee, S., Wu, M.C. & Lin, X. Optimal tests for rare variant effects in sequencing association studies. *Biostatistics* (2012).
12. Aulchenko, Y.S., Ripke, S., Isaacs, A. & van Duijn, C.M. GenABEL: an R library for genome-wide association analysis. *Bioinformatics* **23**, 1294-6 (2007).
